# Supplementary material
Source: HighWire-hosted journal article supplement (https://www.annfammed.org/highwire/filestream/14737/field_highwire_adjunct_files/0/SocialRisks.pdf)
Supplement: SocialRisks.pdf [file SocialRisks.pdf]

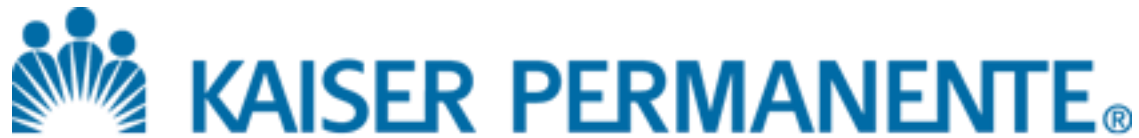

## Kaiser Permanente Washington Health Research Institute

Social risks: Do patients want health systems to help?

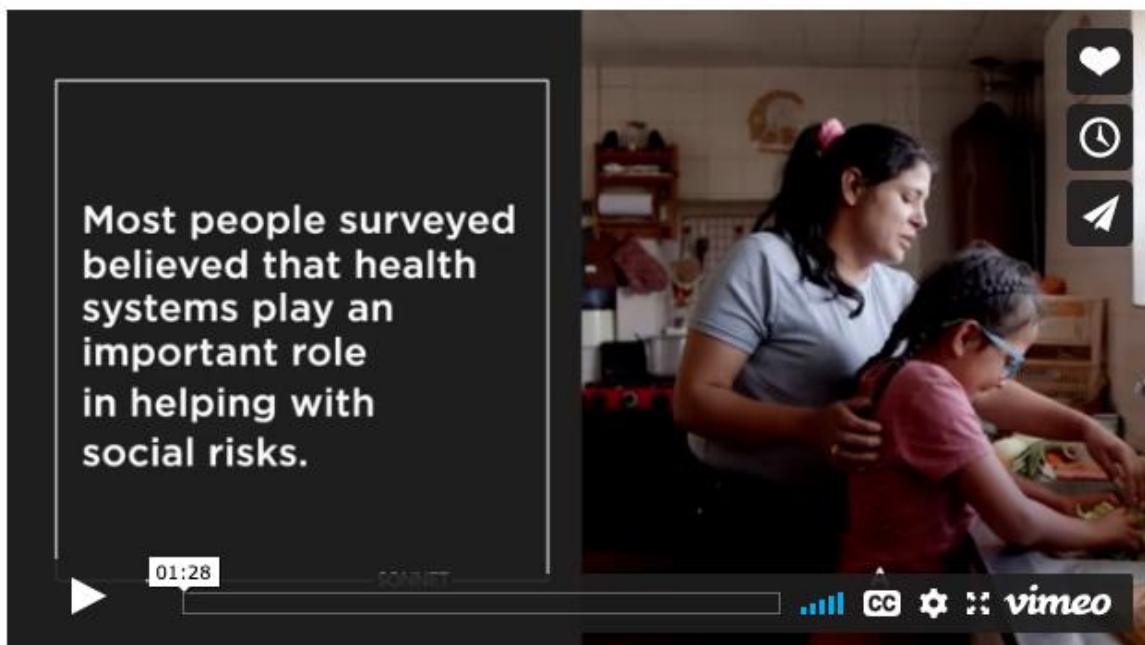

New SONNET study led by Leah Tuzzio, MPH, looks at patients' unmet social risks and their desire for assistance
